# Supplementary material for: MoO2Cl2(DMF)2 catalyzed microwave assisted reductive cyclisation of nitroaromatics into dibenzodiazepines
Source: Royal Society of Chemistry journal article supplement (doi:10.1039/c4ra11089g), 2014-12-05
Supplement: c4ra11089g1.pdf [file c4ra11089g1.pdf]

**Supporting Information**

**For**

**MoO<sub>2</sub>Cl<sub>2</sub>(dmf)<sub>2</sub> catalyzed microwave assisted reductive cyclisation of  
nitroaromatics into dibenzodiazepines**

**I.R.Siddiqui,\*Archana Singh, Anushree Srivastava, Shayna Shamim, Pragati Rai**

*Laboratory of Green synthesis, Department of Chemistry*

*University of Allahabad, Allahabad-211002*

*\*Corresponding author's E-mail address: [dr.irsiddiqui@gmail.com](mailto:dr.irsiddiqui@gmail.com)*

## Table of Contents:

|                                     |     |
|-------------------------------------|-----|
| (A) Typical Experimental Procedure  | 2-3 |
| (B) Characteristic data of Products | 3-6 |

## Experimental

### Materials

All chemical were reagent grade purchased from Aldrich and Alfa Aesar and were used without purification. NMR spectra were recorded on a BRUKER AVANCE II-400FT Spectrometer (400 for <sup>1</sup>H NMR, 100MHz for <sup>13</sup>C) using CDCl<sub>3</sub> as solvent and TMS as an internal reference. Mass spectra were recorded on a JEOL SX-102 (FAB) mass spectra at 70ev. Elemental analyses were carried out in a Coleman automatic carbon, hydrogen, oxygen, chlorine and nitrogen analyzer. All the reactions were monitored by TLC using 40 precoated sheets of silica gel G/UV-254 of 0.25mm thickness (Merck 60F254). Melting points were determined by open glass capillary method and were uncorrected.

### Method

*Typical procedure for the formation of 5'-amino-6'-isocyanospiro[thiazolidine-2,7'-thiazolo[3,2-a]pyrimidin]-4-one (5a)*

Herein, Microwave assisted synthesis of diabenzodiazepines **3(a-j)** procedure by a mixture of 2-nitroaniline **1** (1mmol), various aromatic aldehydes **2(a-j)** (1mmol), Ph<sub>3</sub>P (2.4 equivalents), 10% mol of MoO<sub>2</sub>Cl<sub>2</sub> (dmf)<sub>2</sub> and toluene (3ml) was irradiated with microwaves at 200°C for 30-35

minutes. After completion of reaction (indicated by TLC), reaction mass was filtered and stand for 1.5 hours to remove the solvent. The mixture was poured into H<sub>2</sub>O (100ml) and extracted with EtOAc (3 x 50ml) and washed with brine (3 x 20ml) dried over MgSO<sub>4</sub>, and the solvent was removed under the reduced pressure. The remaining residue was purified by flash column chromatography to give analytically pure 3(a-j). All products were characterized by comparison of their mp, <sup>1</sup>H NMR spectra with those of authentic samples. [4]

### Spectral data for 3(a-j)

#### Compound 3a: 5H-dibenzo[b,e][1,4]diazepine.

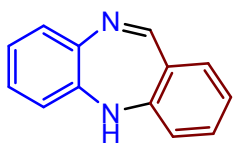

White solid, mp 138°C; yield 75% (MW), 42% (Thermal). <sup>1</sup>H NMR (CDCl<sub>3</sub>): δ 4.0 (s, 1H, NH), 6.6-6.9 (m, 4H, ArH), 7.0-7.4 (m, 4H, Ar'H), 8.39 (s, 1H, CH). <sup>13</sup>C NMR (CDCl<sub>3</sub>): δ 114.1, 118.7, 118.9, 119.6, 120.4,

123.2, 128.2, 130.0, 139.5, 141.6, 142.1, 144.4, 160.9. MS (EI): m/z: 194. Anal. Calcd for C<sub>13</sub>H<sub>10</sub>N<sub>2</sub>: H,5.19, N,14.42, C,80.39. Found H,5.22, N,14.45, C,80.41.

#### Compound 3b: 4-chloro-5H-dibenzo[b,e][1,4]diazepine.

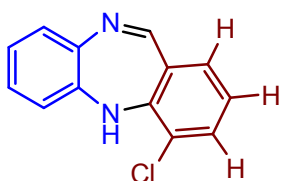

White solid, mp 144°C; yield 74% (MW), 44% (Thermal). <sup>1</sup>H NMR (CDCl<sub>3</sub>): δ 4.0 (s, 1H, NH), 6.6-7.0 (m, 4H, ArH), 7.2-7.6 (m, 3H, Ar'H), 8.39 (s, 1H, CH). <sup>13</sup>C NMR (CDCl<sub>3</sub>): δ 115.5, 119.6, 120.1,

120.4, 123.2, 128.1, 128.2, 133.4, 139.2, 139.5, 144.0, 144.4, 160.9. MS (EI): m/z: 228. Anal.

Calcd for  $C_{13}H_9ClN_2$ : H,3.96, N,12.25, Cl,15.50, C,68.28. Found H,3.98, N,12.31, Cl,15.57, C, 68.31.

**Compound 3c: 4-nitro-5H-dibenzo[b,e][1,4]diazepine.**

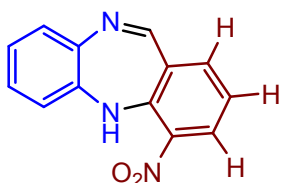

Pale white solid, mp 152°C; yield 73% (MW), 40% (Thermal).  $^1H$  NMR ( $CDCl_3$ ):  $\delta$  4.0 (s, 1H, NH), 6.5-7.0 (m, 4H, ArH), 7.2-7.6 (m, 3H, Ar'H), 8.39 (s, 1H, CH).  $^{13}C$  NMR ( $CDCl_3$ ):  $\delta$  115.0, 119.6, 119.8, 120.4, 123.2, 128.2, 136.1, 138.6, 138.7, 139.5, 139.8, 144.4, 160.9.

MS (EI): m/z: 239. Anal. Calcd for  $C_{13}H_9N_3O_2$ ; H,3.79, O,13.38, N,17.56, C,65.27. Found H,3.81, O,13.46, N,17.58, C,65.29.

**Compound 3d: 4-methoxy-5H-dibenzo[b,e][1,4]diazepine**

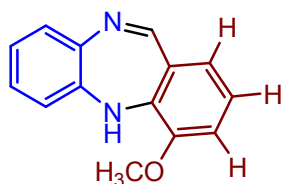

Whitish solid, mp 128°C; yield 75% (MW), 42% (Thermal).  $^1H$  NMR ( $CDCl_3$ ):  $\delta$  3.73 (s, 3H,  $OCH_3$ ), 4.0 (s, 1H, NH), 6.5-7.0 (m, 4H, ArH), 7.1-7.6 (m, 3H, Ar'H), 8.39 (s, 1H, CH).  $^{13}C$  NMR ( $CDCl_3$ ):  $\delta$  55.9, 114.4, 117.5, 118.1, 119.4, 119.6, 120.4, 122.4, 123.2, 128.2, 130.3, 139.5, 150.4, 160.9. MS (EI): m/z: 224. Anal. Calcd for  $C_{14}H_{12}N_2O$  : H,5.39, O,7.13, N,12.49, C,74.98. Found H,5.42, O,7.19, N,12.52, C,74.96.

**Compound 3e: 3,4-dimethoxy-5H-dibenzo[b,e][1,4]diazepine.**

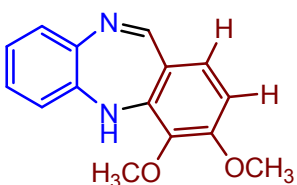

White solid, mp 120°C; yield 78% (MW), 45% (Thermal).  $^1H$  NMR ( $CDCl_3$ ):  $\delta$  3.73 (s, 6H, 2 x  $OCH_3$ ), 4.0 (s, 1H, NH), 6.9-6.7 (m, 4H, ArH), 7.4-7.0 (m, 2H, Ar'H), 8.39 (s, 1H, CH).  $^{13}C$  NMR ( $CDCl_3$ ):  $\delta$

49.8, 56.2, 115.1, 119.6, 119.7, 120.4, 122.3, 123.2, 127.7, 128.2, 130.2, 139.5, 144.4, 160.6, 160.9. MS (EI): m/z:254. Anal. Calcd for C<sub>15</sub>H<sub>14</sub>N<sub>2</sub>O<sub>2</sub>: H,5.55, N,11.02, O,12.58, C,70.85. Found H,5.58, O,12.61, N,11.09, C,70.89.

### Compound 3f: 4-chloro-3-nitro-5H-dibenzo[b,e][1,4]diazepine

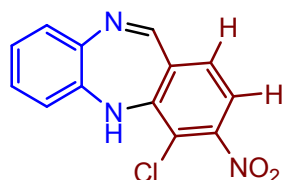

Dirty white solid. mp 158°C; yield 80% (MW), 43% (Thermal). <sup>1</sup>H NMR (CDCl<sub>3</sub>): δ 4.0 (s, 1H, NH), 7.0-6.5 (m, 4H, ArH), 7.3-7.5 (m, 2H, Ar'H), 8.39 (s, 1H, CH). <sup>13</sup>C NMR (CDCl<sub>3</sub>): δ 112.1, 118.4, 119.6, 120.4, 123.2, 124.6, 128.2, 129.1, 139.5, 144.4, 145.0, 152.0, 160.9. MS (EI): m/z: 273. Anal. Calcd for C<sub>13</sub>H<sub>8</sub>ClN<sub>3</sub>O<sub>2</sub>: H,2.95, O,11.68, Cl,12.95, N,15.35, C,57.05. Found H,2.98, O,11.72, Cl,12.98, N,15.39, C,57.12.

### Compound 3g: 3,4-dinitro-5H-dibenzo[b,e][1,4]diazepine

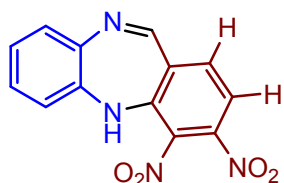

Pale white solid. mp 148°C; yield 76% (MW), 44% (Thermal). <sup>1</sup>H NMR (CDCl<sub>3</sub>): δ 4.0 (s, 1H, NH), 7.1-6.7 (m, 4H, ArH), 7.5-7.3 (m, 2H, Ar'H), 8.39 (s, 1H, CH). <sup>13</sup>C NMR (CDCl<sub>3</sub>): δ 111.6, 119.6, 120.4, 123.2, 124.1, 128.2, 133.1, 137.1, 139.5, 139.7, 144.4, 146.7, 160.9. MS (EI): m/z: 284. Anal. Calcd for C<sub>13</sub>H<sub>8</sub>N<sub>4</sub>O<sub>4</sub>: H,2.84, N,19.72, O,22.52, C,54.93. Found H,2.86, N,19.75, O,22.55, C,54.99.

### Compound 3h: 4-methyl-5H-dibenzo[b,e][1,4]diazepine

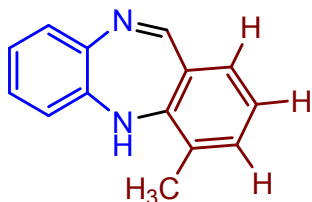

Dirty yellow solid, mp 136°C; yield 75% (MW), 42% (Thermal). <sup>1</sup>H NMR (CDCl<sub>3</sub>): δ 2.35 (s, 3H, CH<sub>3</sub>), 4.0 (s, 1H, NH), 7.0-6.5 (m, 4H, ArH), 7.7-7.2 (m, 3H, Ar'H), 8.39 (s, 1H, CH). <sup>13</sup>C NMR (CDCl<sub>3</sub>): δ 15.5, 117.0, 118.3, 119.6, 120.4, 123.2, 127.1, 128.2, 131.9, 132.3,

138.3, 139.5, 144.4, 160.9. MS (EI): m/z: 208. Anal. Calcd for C<sub>14</sub>H<sub>12</sub>N<sub>2</sub>:; H,5.81, N,13.45, C,80.74. Found H,5.87, N,13.54, C,80.79.

**Compound 3i: 3,4-dimethyl-5H-dibenzo[b,e][1,4]diazepine**

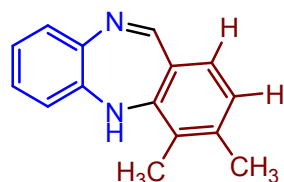

White solid, mp 132°C; yield 77% (MW), 41% (Thermal). <sup>1</sup>H NMR (CDCl<sub>3</sub>): δ 2.35 (s, 6H, 2 x CH<sub>3</sub>), 4.0 (s, 1H, NH), 6.9-6.5 (m, 4H, ArH), 7.3-7.0 (m, 2H, Ar'H), 8.39 (s, 1H, CH). <sup>13</sup>C NMR (CDCl<sub>3</sub>): δ 9.0, 17.8, 114.0, 118.6, 119.6, 120.4, 123.2, 125.7, 127.0, 128.2, 138.2, 139.5, 140.1, 144.4, 160.9. MS (EI): m/z: 222. Anal. Calcd for C<sub>15</sub>H<sub>14</sub>N<sub>2</sub>: H,6.35, N,12.60, C,81.05. Found H,6.38, N,12.72, C,81.11.

**Compound 3j: 3,4-dichloro-5H-dibenzo[b,e][1,4]diazepine**

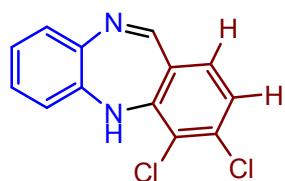

Dirty white solid mp.146°C; yield 78% (MW), 40% (Thermal). <sup>1</sup>H NMR (CDCl<sub>3</sub>): δ 4.0 (s, 1H, NH), 7.0-6.5 (m, 4H, ArH), 7.4-7.1 (m, 2H, Ar'H), 8.39 (s, 1H, CH). <sup>13</sup>C NMR (CDCl<sub>3</sub>): δ 116.6, 119.6, 119.9, 120.4, 123.2, 128.2, 128.7, 129.6, 136.6, 139.5, 144.4, 145.5, 160.9 MS (EI): m/z: 262. Anal. Calcd for C<sub>13</sub>H<sub>8</sub>Cl<sub>2</sub>N<sub>2</sub>: H,3.06, N,10.65, Cl,26.95, C,59.34. Found H,3.07, N,10.71, Cl,26.98, C,59.43.
